# Supplementary material for: Prediction and Experimental Validation of a New Salinity-Responsive Cis-Regulatory Element (CRE) in a Tilapia Cell Line
Source: Life (Basel). 2022 May 25;12(6):787. doi: 10.3390/life12060787 (PMC9225295; doi:10.3390/life12060787)
Supplement: Supplementary file 1 [file life-12-00787-s001.zip › life-1712406-supplementary.pdf]

## Supplementary Material

### Title: Prediction and experimental validation of a new salinity-responsive *cis*-regulatory element (CRE) in tilapia cell line

Chanhee Kim<sup>1</sup>, Xiaodan Wang<sup>2</sup> and Dietmar Kültz<sup>1,\*</sup>

<sup>1</sup>Stress-induced Evolution Laboratory, Department of Animal Sciences, University of California, Davis, CA, 95616; cshkim@ucdavis.edu, dkultz@ucdavis.edu

<sup>2</sup>Laboratory of Aquaculture Nutrition and Environmental Health, School of Life Sciences, East China Normal University, Shanghai, 200241, PR China; xdwang@bio.ecnu.edu.cn

\*Correspondence: dkultz@ucdavis.edu; Tel.: +1 530 752 2991

### Supplementary Figures:

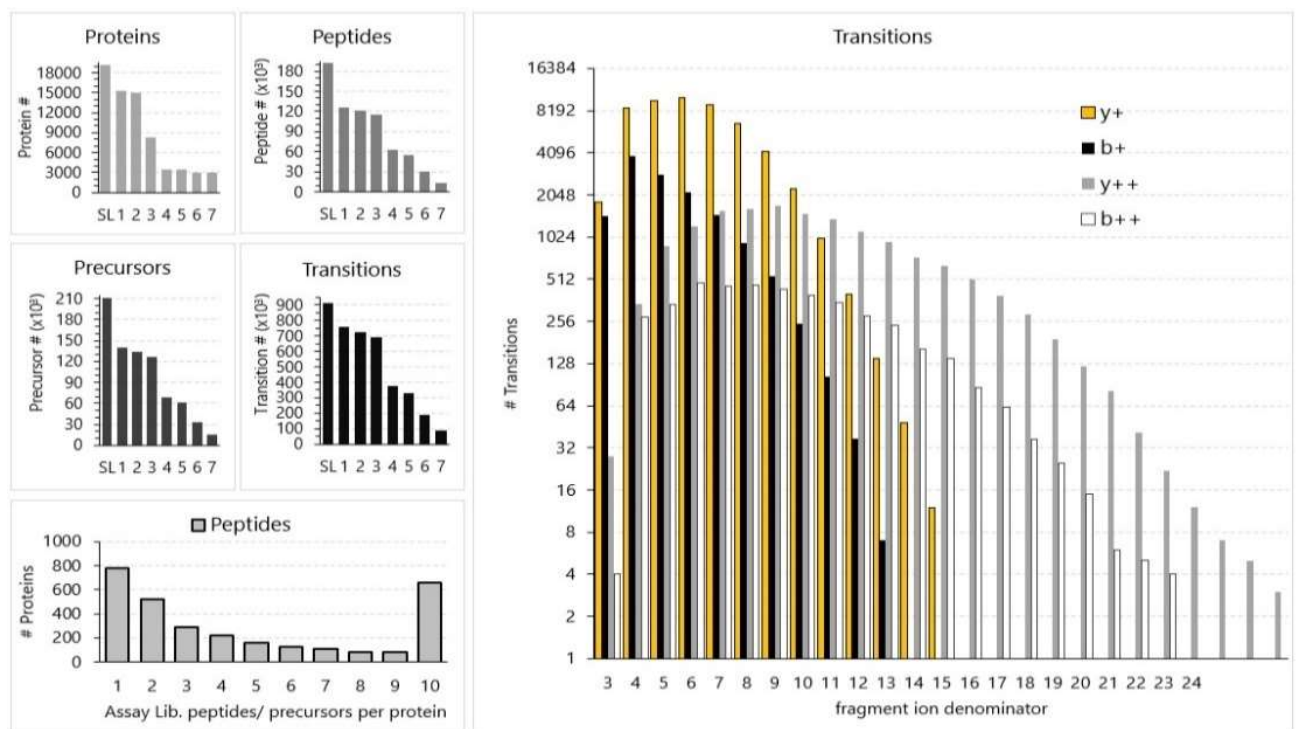

**Figure S1:** DIA assay library of *Oreochromis mossambicus* OmB cells. The initial spectral library (SL) contains over 18,000 proteins, 200,000 precursors, and almost 1 million transitions. Seven quality control (QC) filters were applied to create the DIA assay library containing 3043 unique proteins, 15,211 precursors (peptides), and 87,184 diagnostic transitions. Most proteins are represented by at least 2 diagnostic peptides. The remainder (25%) was identified by at least 2 unique peptides but only 1 remains after applying all DIA QC filters.

A. chloride intracellular channel 2 (cltc2)\_Wild Type

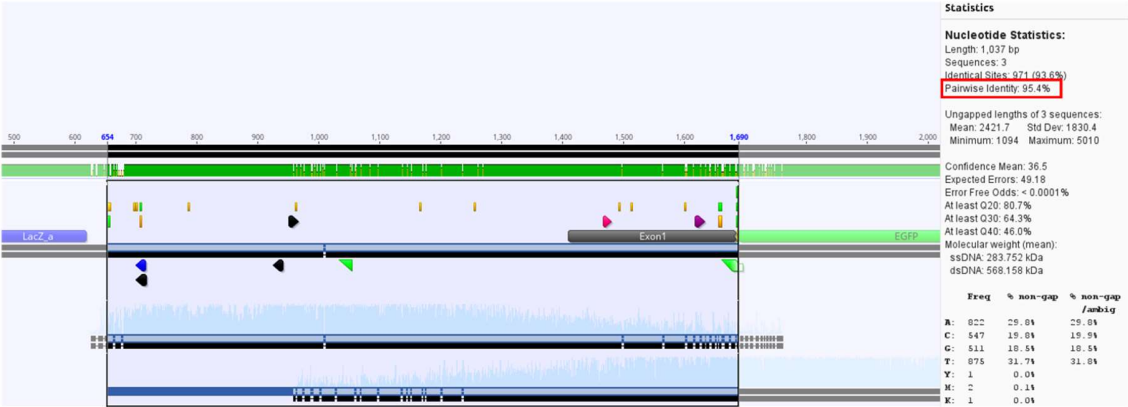

B. chloride intracellular channel 2 (cltc2)\_STREME1 motif mutant

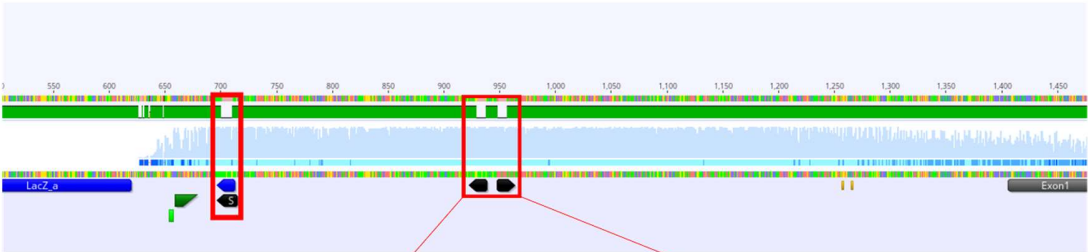

C. cltc2\_STREME1 motif mutagenesis representative result

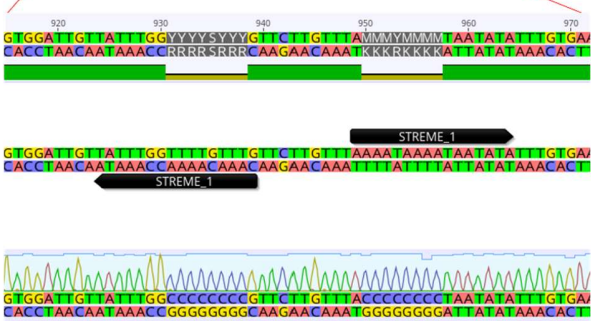

#### D. uridine phosphorylase 1 (upp1)\_Wild Type

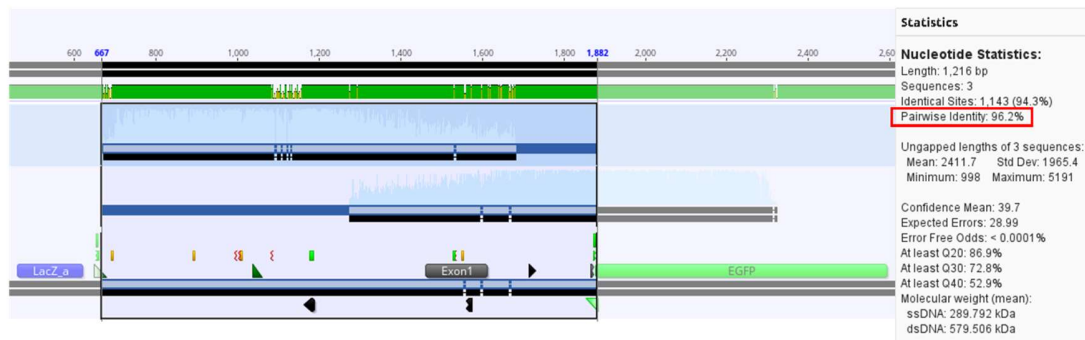

#### E. uridine phosphorylase 1 (upp1)\_STREME1 motif mutant

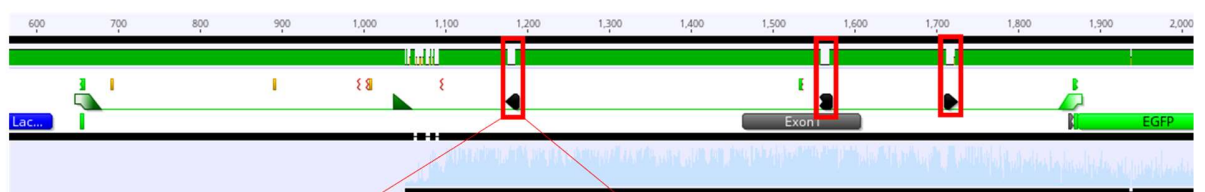

#### F. upp1\_STREME1 motif mutagenesis representative result

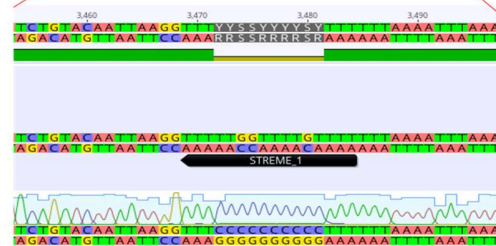

**Figure S2:** Sequence information of wild-type and mutant versions of approximately 1kb long proximal extended promoter regions of *clt2* and *upp1* that were used for quantitative GFP reporter assays. (A) The pairwise identity of *clt2* sequences between *Oreochromis mossambicus* and *Oreochromis niloticus* (reference genome) is 95.4 % as marked by red box. (B) STREME1 motifs found in the 1 kb promoter region of *clt2* were mutated using site-directed mutagenesis and confirmed by Sanger sequencing as indicated by red boxes. (C) A representative result of mutagenesis was shown with distinct chromatograms between wild-type reference (upper, STREME1 annotated) and mutant form (bottom). (D) The pairwise identity of *upp1* sequences between *Oreochromis mossambicus* and *Oreochromis niloticus* (reference genome) is 96.2 % as marked by red box. (E) STREME1 motifs found in the 1 kb promoter region of *upp1* were mutated using site-directed mutagenesis and confirmed by Sanger sequencing as indicated by red boxes. (F) A representative result of mutagenesis was shown with distinct chromatograms between wild-type reference (upper, STREME1 annotated) and mutant form (bottom).

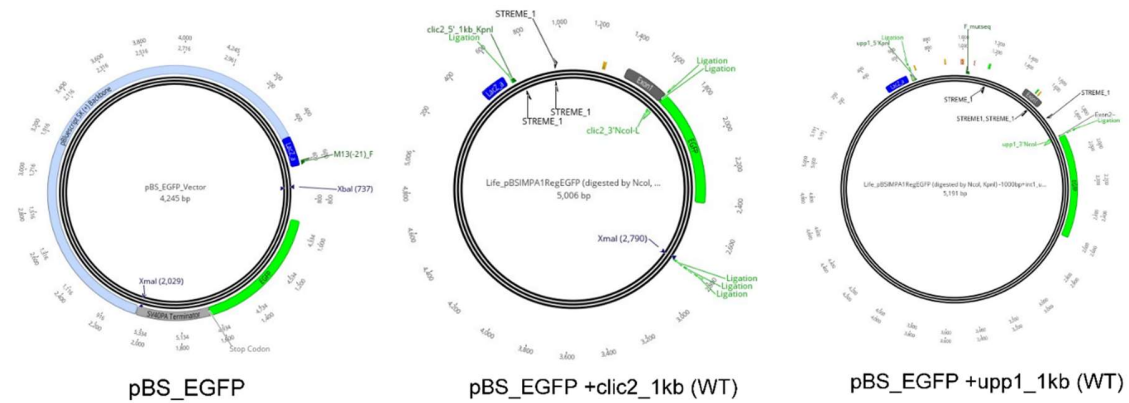

**Figure S3:** The schematic maps of the plasmids constructed for testing two candidate regions of *clic2* and *upp1*. pBS\_EGFP (basic backbone vector) is displayed at the left side, clic2\_1kb\_proximal extended promoter cloned pBS\_EGFP (pBS\_EGFP+clic2\_1kb (WT)) at center, and upp1\_1kb\_proximal extended promoter cloned pBS\_EGFP (pBS\_EGFP+upp1\_1kb (WT)) at the right side.

## Supplementary Tables:

**Table S1: Primer sequence information used in this study.**

| Primer Purpose           | Primer Name           | Primer Sequence                                 |
|--------------------------|-----------------------|-------------------------------------------------|
| Wildtype PCR and Cloning | cllc2_5'KpnI          | CCCCCGGTACCCCTAATCAGAAGGATGCAGA                 |
|                          | cllc2_3'NcoI          | CCCCCCCATGGTTTATCCCCCAAAGTTTTGT                 |
|                          | upp1_5'KpnI           | CCCCCGGTACCGTCCTGAACTGAAGTGATG                  |
|                          | upp1_3'NcoI           | CCCCCCCATGGTTCCTGCGAACAGCCGAA                   |
|                          | cllc2_5'KpnI          | CCCCCGGTACCCCTAATCAGAAGGATGCAGA                 |
|                          | cllc2_1p_3'overlapped | GCATTAGCAAAGGGGGGGGAAAAACCAAGCTGAAGTTCATTA      |
| Mutant PCR and Cloning   | cllc2_2p_5'overlapped | GCTTGGTTTTTCCCCCCCCCTTGCTAATGCTATTGTTTCGAA      |
|                          | cllc2_2p_3'overlapped | GCATTAGCAAAGGGGGGGGAAAAACCAAGCTGAAGTTCATTA      |
|                          | cllc2_3p_5'overlapped | GCTTGGTTTTTCCCCCCCCCTTGCTAATGCTATTGTTTCGAA      |
|                          | upp1_1p_3'overlapped  | AGTGCCGGAATAAAAAAAGGGGGGGGGATATAGCTGGC          |
|                          | upp1_2p_5'overlapped  | CCAAGGCCAGCTATATCCCCCCCCCTTTTTTTATTCCG          |
|                          | upp1_2p_3'overlapped  | CACGAAACCAAGAAGGGGGGGGAAAATTAAGAAGATACAGAT      |
|                          | upp1_3p_5'overlapped  | TATCTTCTTTTAATTTCCCCCCCCCTTCTGGTTTCGTGAGTC      |
|                          | upp1_3p_3'overlapped  | AGATCTGTACAATTAAGGTTTCCCCCCCCCTTTTTAAATTTAAAC   |
|                          | upp1_4p_5'overlapped  | TTAAATTTAAAAAAGGGGGGGGGAAACCTTAATTGTACAGATCTGAT |
|                          |                       |                                                 |
| Sequencing               | M13_Forward           | TGTAAACGACGGCCAGT                               |
|                          | GFP_R5                | TTCTTCTGCTTGTCGCCAT                             |

**Table S2: STREME1\_FIMO search result of the 19 regulatory regions for both occurrences and hits- [see the attached Microsoft Excel Spreadsheet file.](#)**

**Table S3: Lists of TFs for STREME motifs searched by TOMTOM- [see the attached Microsoft Excel Spreadsheet file.](#)**
