# Supplementary material for: Prediction and Experimental Validation of a New Salinity-Responsive Cis-Regulatory Element (CRE) in a Tilapia Cell Line
Source: Life (Basel). 2022 May 25;12(6):787. doi: 10.3390/life12060787 (PMC9225295; doi:10.3390/life12060787)
Supplement: Supplementary file 1 [file life-12-00787-s001.zip › Table S2.xlsx]

## Sheet: STREMRE1_FIMO_occurrences
	#	Motif ID	Alt ID	Sequence Name	Strand	Start	End	p-value	q-value	Matched Sequence
	1	AAAACAAAACAMWAAA	STREME1	glulb	-	467	482	1.44e-08	0.000971	AAAACAAAAAACAAAA
	2	AAAACAAAACAMWAAA	STREME1	fth1a	+	4714	4729	2.49e-08	0.000971	AAAACAAAAAAAAAAA
	3	AAAACAAAACAMWAAA	STREME1	gst-A'	+	807	822	3.2e-08	0.000971	CAAACAAAACACCAAA
	4	AAAACAAAACAMWAAA	STREME1	gstA-X3	-	272	287	3.32e-08	0.000971	AAAACAAAACCAAAAA
	5	AAAACAAAACAMWAAA	STREME1	upp1	+	1247	1262	3.32e-08	0.000971	AAAACAAAACCAAAAA
	6	AAAACAAAACAMWAAA	STREME1	s100w	-	2412	2427	3.48e-08	0.000971	AAAACAAAACAAAAAC
	7	AAAACAAAACAMWAAA	STREME1	lrpap1	+	2880	2895	3.71e-08	0.000971	AAAACAAAAAAACAAA
	8	AAAACAAAACAMWAAA	STREME1	glulb	+	569	584	5.36e-08	0.00119	AAAACAAAACAAAACA
	9	AAAACAAAACAMWAAA	STREME1	glulb	-	460	475	6.46e-08	0.00119	AAAACAAAACAAACAA
	10	AAAACAAAACAMWAAA	STREME1	glulb	+	574	589	6.46e-08	0.00119	AAAACAAAACAAACAA
	11	AAAACAAAACAMWAAA	STREME1	gstA-X1	+	4858	4873	7.7e-08	0.00128	AAAACAAAAAACCATA
	12	AAAACAAAACAMWAAA	STREME1	gstA-X1'	-	2289	2304	9.33e-08	0.00132	CAAACAAAACACCATA
	13	AAAACAAAACAMWAAA	STREME1	gst-X5	-	2307	2322	9.33e-08	0.00132	CAAACAAAACACCATA
	14	AAAACAAAACAMWAAA	STREME1	isyna1	+	4628	4643	1.18e-07	0.00148	AAAACAAAATAAAATA
	15	AAAACAAAACAMWAAA	STREME1	scinla	-	4219	4234	1.21e-07	0.00148	AATACAATACAATAAA
	16	AAAACAAAACAMWAAA	STREME1	gst-A	-	2765	2780	1.31e-07	0.00151	AAAACAAAACAATGAC
	17	AAAACAAAACAMWAAA	STREME1	glulb	-	473	488	1.77e-07	0.00188	AAAACAAAAACAAAAA
	18	AAAACAAAACAMWAAA	STREME1	glula	+	5594	5609	1.92e-07	0.00188	AAAACAAAACAATGGA
	19	AAAACAAAACAMWAAA	STREME1	lrpap1	-	4163	4178	1.95e-07	0.00188	AAAACTAAAAACTAAA
	20	AAAACAAAACAMWAAA	STREME1	gstA-X1	+	4403	4418	2.25e-07	0.00207	CAAACAAAACAAAAAC
	21	AAAACAAAACAMWAAA	STREME1	gst-A	+	2439	2454	2.68e-07	0.00234	AAAACAAAAAAAAACA
	22	AAAACAAAACAMWAAA	STREME1	gst-A'	-	13	28	3.19e-07	0.00266	AAAACACAACAAGAAA
	23	AAAACAAAACAMWAAA	STREME1	isyna1	-	2315	2330	3.38e-07	0.0027	AAAACAACAAAAAAAA
	24	AAAACAAAACAMWAAA	STREME1	gstA-X3	-	267	282	3.63e-07	0.00277	AAAACCAAAAAAAAAA
	25	AAAACAAAACAMWAAA	STREME1	gst-A	-	1861	1876	4.38e-07	0.00321	AAAACACAACAAAGAA
	26	AAAACAAAACAMWAAA	STREME1	glulb	-	455	470	4.91e-07	0.00322	AAAACAAACAAACAAA
	27	AAAACAAAACAMWAAA	STREME1	gst-A'	+	799	814	4.91e-07	0.00322	AAAACAAACAAACAAA
	28	AAAACAAAACAMWAAA	STREME1	lrpap1	-	4200	4215	4.91e-07	0.00322	AAAACAAACAAACAAA
	29	AAAACAAAACAMWAAA	STREME1	clic2	-	4518	4533	5.66e-07	0.00358	CAAACAAAACCAAATA
	30	AAAACAAAACAMWAAA	STREME1	arg2	-	4210	4225	7.27e-07	0.00444	AAAATAAAATAAAAAA
	31	AAAACAAAACAMWAAA	STREME1	carbonylreductase1	+	3441	3456	8.8e-07	0.00521	AAAATAAAATACTATA
	32	AAAACAAAACAMWAAA	STREME1	glula	-	588	603	1.05e-06	0.00599	AATACAACACAAGAAA
	33	AAAACAAAACAMWAAA	STREME1	clic2	-	1047	1062	1.1e-06	0.00599	AAAATAAAACAACACA
	34	AAAACAAAACAMWAAA	STREME1	arg2	+	1780	1795	1.11e-06	0.00599	AATACAATACAATCAA
	35	AAAACAAAACAMWAAA	STREME1	clic2	-	4294	4309	1.26e-06	0.00643	CAAACAAAAAAAAACA
	36	AAAACAAAACAMWAAA	STREME1	scinla	+	4511	4526	1.27e-06	0.00643	AAAACCAAAAACAAAC
	37	AAAACAAAACAMWAAA	STREME1	upp1	-	1094	1109	1.3e-06	0.00643	GAAACAAAACAAAAAA
	38	AAAACAAAACAMWAAA	STREME1	s100w	+	2590	2605	1.45e-06	0.00702	AAAACTAAAAACAAAC
	39	AAAACAAAACAMWAAA	STREME1	glulb	-	447	462	1.51e-06	0.00711	CAAACAAAAAAAACAA
	40	AAAACAAAACAMWAAA	STREME1	glulb	-	451	466	1.68e-06	0.00772	CAAACAAACAAAAAAA
	41	AAAACAAAACAMWAAA	STREME1	isyna1	-	2320	2335	1.78e-06	0.00797	AAAAAAAAACAACAAA
	42	AAAACAAAACAMWAAA	STREME1	s100w	-	2407	2422	2.03e-06	0.00854	AAAACAAAAACAAATC
	43	AAAACAAAACAMWAAA	STREME1	fth1a	-	1859	1874	2.05e-06	0.00854	AATACACAAAAATATA
	44	AAAACAAAACAMWAAA	STREME1	clic2	+	4543	4558	2.06e-06	0.00854	AAAATAAAATAACATA
	45	AAAACAAAACAMWAAA	STREME1	lrpap1	-	4196	4211	2.09e-06	0.00854	CAAACAAACAAACAAA
	46	AAAACAAAACAMWAAA	STREME1	s100w	+	2597	2612	2.28e-06	0.00894	AAAACAAACTAAAAAC
	47	AAAACAAAACAMWAAA	STREME1	upp1	-	711	726	2.29e-06	0.00894	AAAACCCAACAACATA
	48	AAAACAAAACAMWAAA	STREME1	upp1	-	1089	1104	2.52e-06	0.00964	AAAACAAAAAAATTAA
	49	AAAACAAAACAMWAAA	STREME1	gstA-X1	+	4399	4414	2.64e-06	0.00986	AAAACAAACAAAACAA
	50	AAAACAAAACAMWAAA	STREME1	aldehyde	+	554	569	2.69e-06	0.00986	CATACAATACAACATA
	51	AAAACAAAACAMWAAA	STREME1	clic2	-	408	423	2.77e-06	0.00998	AAAACAAACAAACACA
	52	AAAACAAAACAMWAAA	STREME1	gst-A'	-	355	370	4.47e-06	0.0112	AAAAAAAAAAAAAAAA
	53	AAAACAAAACAMWAAA	STREME1	glulb	-	2322	2337	4.47e-06	0.0112	AAAAAAAAAAAAAAAA
	54	AAAACAAAACAMWAAA	STREME1	glulb	+	1361	1376	4.47e-06	0.0112	AAAAAAAAAAAAAAAA
	55	AAAACAAAACAMWAAA	STREME1	glulb	+	1362	1377	4.47e-06	0.0112	AAAAAAAAAAAAAAAA
	56	AAAACAAAACAMWAAA	STREME1	glulb	+	1363	1378	4.47e-06	0.0112	AAAAAAAAAAAAAAAA
	57	AAAACAAAACAMWAAA	STREME1	glulb	+	1364	1379	4.47e-06	0.0112	AAAAAAAAAAAAAAAA
	58	AAAACAAAACAMWAAA	STREME1	glulb	+	1365	1380	4.47e-06	0.0112	AAAAAAAAAAAAAAAA
	59	AAAACAAAACAMWAAA	STREME1	glulb	+	1366	1381	4.47e-06	0.0112	AAAAAAAAAAAAAAAA
	60	AAAACAAAACAMWAAA	STREME1	glulb	+	1367	1382	4.47e-06	0.0112	AAAAAAAAAAAAAAAA
	61	AAAACAAAACAMWAAA	STREME1	glulb	+	1368	1383	4.47e-06	0.0112	AAAAAAAAAAAAAAAA
	62	AAAACAAAACAMWAAA	STREME1	glulb	+	1369	1384	4.47e-06	0.0112	AAAAAAAAAAAAAAAA
	63	AAAACAAAACAMWAAA	STREME1	glulb	+	1370	1385	4.47e-06	0.0112	AAAAAAAAAAAAAAAA
	64	AAAACAAAACAMWAAA	STREME1	fth1a	+	4719	4734	4.47e-06	0.0112	AAAAAAAAAAAAAAAA
	65	AAAACAAAACAMWAAA	STREME1	fth1a	+	4720	4735	4.47e-06	0.0112	AAAAAAAAAAAAAAAA
	66	AAAACAAAACAMWAAA	STREME1	fth1a	+	4721	4736	4.47e-06	0.0112	AAAAAAAAAAAAAAAA
	67	AAAACAAAACAMWAAA	STREME1	fth1a	+	4722	4737	4.47e-06	0.0112	AAAAAAAAAAAAAAAA
	68	AAAACAAAACAMWAAA	STREME1	fth1a	+	4723	4738	4.47e-06	0.0112	AAAAAAAAAAAAAAAA
	69	AAAACAAAACAMWAAA	STREME1	fth1a	+	4724	4739	4.47e-06	0.0112	AAAAAAAAAAAAAAAA
	70	AAAACAAAACAMWAAA	STREME1	fth1a	+	4725	4740	4.47e-06	0.0112	AAAAAAAAAAAAAAAA
	71	AAAACAAAACAMWAAA	STREME1	fth1a	+	4726	4741	4.47e-06	0.0112	AAAAAAAAAAAAAAAA
	72	AAAACAAAACAMWAAA	STREME1	fth1a	+	4727	4742	4.47e-06	0.0112	AAAAAAAAAAAAAAAA
	73	AAAACAAAACAMWAAA	STREME1	clic2	+	5810	5825	4.51e-06	0.0112	AAAACAAAATAAGGCA
	74	AAAACAAAACAMWAAA	STREME1	gstA-X3	-	266	281	4.53e-06	0.0112	AAACCAAAAAAAAAAA
	75	AAAACAAAACAMWAAA	STREME1	glulb	-	4725	4740	4.71e-06	0.0115	AAAATACAACACAAGA
	76	AAAACAAAACAMWAAA	STREME1	gst-A	+	3926	3941	4.83e-06	0.0117	AAAACACCACACCCAA
	77	AAAACAAAACAMWAAA	STREME1	s100w	+	2601	2616	5.04e-06	0.012	CAAACTAAAAACTACA
	78	AAAACAAAACAMWAAA	STREME1	lrpap1	-	51	66	5.49e-06	0.0128	AAAATTAAATAAAAAA
	79	AAAACAAAACAMWAAA	STREME1	gstA-X1'	-	4727	4742	5.58e-06	0.0128	AAAATCAAACAAAACA
	80	AAAACAAAACAMWAAA	STREME1	gst-X5	-	4745	4760	5.58e-06	0.0128	AAAATCAAACAAAACA
	81	AAAACAAAACAMWAAA	STREME1	glula	+	5541	5556	5.69e-06	0.0129	AAAATAAAAAAACATC
	82	AAAACAAAACAMWAAA	STREME1	carbonylreductase1	-	4986	5001	6.18e-06	0.0138	AAAACAAACACAAAAC
	83	AAAACAAAACAMWAAA	STREME1	aldehyde	+	2152	2167	6.35e-06	0.014	AATACCAACTACTAAA
	84	AAAACAAAACAMWAAA	STREME1	aldehyde	+	559	574	6.42e-06	0.014	AATACAACATACAAGA
	85	AAAACAAAACAMWAAA	STREME1	glulb	-	1408	1423	6.8e-06	0.0146	AAAACTATAAAATACA
	86	AAAACAAAACAMWAAA	STREME1	glulb	+	564	579	6.84e-06	0.0146	AGAACAAAACAAAACA
	87	AAAACAAAACAMWAAA	STREME1	gst-A	+	2449	2464	7.24e-06	0.0153	AAAACAACACCATCAC
	88	AAAACAAAACAMWAAA	STREME1	glulb	-	2267	2282	7.54e-06	0.0157	AAAATAATACCAGAAA
	89	AAAACAAAACAMWAAA	STREME1	lrpap1	-	4192	4207	7.84e-06	0.0158	CAAACAAACAAAAACA
	90	AAAACAAAACAMWAAA	STREME1	scinla	-	4224	4239	7.84e-06	0.0158	AATATAATACAATACA
	91	AAAACAAAACAMWAAA	STREME1	clic2	-	2374	2389	7.91e-06	0.0158	AAAACAAACCCATCAC
	92	AAAACAAAACAMWAAA	STREME1	carbonylreductase1	+	1329	1344	7.91e-06	0.0158	AAAACAAACAAAAACC
	93	AAAACAAAACAMWAAA	STREME1	lrpap1	-	4205	4220	8e-06	0.0158	AAACCAAAACAAACAA
	94	AAAACAAAACAMWAAA	STREME1	glulb	-	5256	5271	8.4e-06	0.0164	AAAACAACAACAACAA
	95	AAAACAAAACAMWAAA	STREME1	isyna1	-	2317	2332	8.6e-06	0.0166	AAAAAACAACAAAAAA
	96	AAAACAAAACAMWAAA	STREME1	gstA-X1'	-	1379	1394	9.77e-06	0.0185	AAAATAAACAAAGAAA
	97	AAAACAAAACAMWAAA	STREME1	gst-X5	-	1397	1412	9.77e-06	0.0185	AAAATAAACAAAGAAA
	98	AAAACAAAACAMWAAA	STREME1	gstA-X1	+	4851	4866	1.01e-05	0.0188	AATAAAAAAAACAAAA
	99	AAAACAAAACAMWAAA	STREME1	gstA-X1	-	3690	3705	1.01e-05	0.0188	CAAACAAAACAGAGAA
	100	AAAACAAAACAMWAAA	STREME1	gstA-X1	+	1660	1675	1.06e-05	0.0191	AAAACAAAATAAAATG
	101	AAAACAAAACAMWAAA	STREME1	s100w	+	2902	2917	1.06e-05	0.0191	AGAACACAACAACAAA
	102	AAAACAAAACAMWAAA	STREME1	gstA-X1	-	3701	3716	1.06e-05	0.0191	AAAACATAAAACAAAC
	103	AAAACAAAACAMWAAA	STREME1	gstA-X1	-	374	389	1.3e-05	0.0232	AAAACAAGAACAAAAA
	104	AAAACAAAACAMWAAA	STREME1	fth1a	+	4718	4733	1.45e-05	0.0256	CAAAAAAAAAAAAAAA
	105	AAAACAAAACAMWAAA	STREME1	fth1a	+	4706	4721	1.51e-05	0.0261	AGTACAAAAAAACAAA
	106	AAAACAAAACAMWAAA	STREME1	carbonylreductase1	-	4326	4341	1.53e-05	0.0261	AAAAACAAACACTGAA
	107	AAAACAAAACAMWAAA	STREME1	glulb	+	535	550	1.54e-05	0.0261	AAAATTAAACAAGACA
	108	AAAACAAAACAMWAAA	STREME1	clic2	-	3428	3443	1.54e-05	0.0261	AAAATACAATAATAGA
	109	AAAACAAAACAMWAAA	STREME1	scinla	-	187	202	1.55e-05	0.0261	AAAACACAGCACTGAA
	110	AAAACAAAACAMWAAA	STREME1	glulb	-	4723	4738	1.72e-05	0.0286	AATACAACACAAGAGC
	111	AAAACAAAACAMWAAA	STREME1	upp1	-	716	731	1.75e-05	0.0286	AAAAAAAAACCCAACA
	112	AAAACAAAACAMWAAA	STREME1	gstA-X1	+	1655	1670	1.75e-05	0.0286	TAAATAAAACAAAATA
	113	AAAACAAAACAMWAAA	STREME1	carbonylreductase1	+	1326	1341	1.77e-05	0.0286	AAAAAAACAAACAAAA
	114	AAAACAAAACAMWAAA	STREME1	fth1a	+	1477	1492	1.78e-05	0.0286	AAAAAAAAATAATAGA
	115	AAAACAAAACAMWAAA	STREME1	upp1	+	560	575	1.8e-05	0.0286	AAAACAAAAAAAGATT
	116	AAAACAAAACAMWAAA	STREME1	gstA-X3	-	4243	4258	1.84e-05	0.0286	CAAATAAAATAAAGTA
	117	AAAACAAAACAMWAAA	STREME1	lrpap1	-	688	703	1.84e-05	0.0286	CAAACAACACAAACTC
	118	AAAACAAAACAMWAAA	STREME1	glulb	-	474	489	1.85e-05	0.0286	AAAAACAAAAACAAAA
	119	AAAACAAAACAMWAAA	STREME1	fth1a	+	4729	4744	1.85e-05	0.0286	AAAAAAAAAAAAAAGA
	120	AAAACAAAACAMWAAA	STREME1	isyna1	-	2319	2334	1.93e-05	0.0292	AAAAAAAACAACAAAA
	121	AAAACAAAACAMWAAA	STREME1	gstA-X1'	-	2392	2407	1.94e-05	0.0292	AAAGCAATAAAACAAA
	122	AAAACAAAACAMWAAA	STREME1	gst-X5	-	2410	2425	1.94e-05	0.0292	AAAGCAATAAAACAAA
	123	AAAACAAAACAMWAAA	STREME1	cytochromeC	+	2641	2656	1.96e-05	0.0293	AAAATATAAAAATAAA
	124	AAAACAAAACAMWAAA	STREME1	isyna1	-	4412	4427	1.99e-05	0.0295	CAAACAAATAACAATA
	125	AAAACAAAACAMWAAA	STREME1	isyna1	-	2303	2318	2.02e-05	0.0295	AAAACGAAAAAAACAA
	126	AAAACAAAACAMWAAA	STREME1	carbonylreductase1	+	1477	1492	2.04e-05	0.0295	ATAATAAAAAAATAAA
	127	AAAACAAAACAMWAAA	STREME1	gstA-X1	+	4367	4382	2.04e-05	0.0295	AAAAGAAAAAAAAAGA
	128	AAAACAAAACAMWAAA	STREME1	clic2	-	3409	3424	2.07e-05	0.0297	AAAATTCAACCCAAAA
	129	AAAACAAAACAMWAAA	STREME1	gstA-X1	+	1377	1392	2.14e-05	0.0299	AAAAAAAAACAAAACC
	130	AAAACAAAACAMWAAA	STREME1	gst-A'	-	3369	3384	2.15e-05	0.0299	AAAAAAAAAAAAACAA
	131	AAAACAAAACAMWAAA	STREME1	fth1a	+	4711	4726	2.15e-05	0.0299	AAAAAAACAAAAAAAA
	132	AAAACAAAACAMWAAA	STREME1	scinla	+	501	516	2.16e-05	0.0299	AATATAATAAAAAGAA
	133	AAAACAAAACAMWAAA	STREME1	scinla	+	1150	1165	2.17e-05	0.0299	AATGTAAAACAATAAA
	134	AAAACAAAACAMWAAA	STREME1	scinla	-	3334	3349	2.2e-05	0.0301	AAAATACAATAATGTA
	135	AAAACAAAACAMWAAA	STREME1	fth1a	+	4713	4728	2.24e-05	0.0301	AAAAACAAAAAAAAAA
	136	AAAACAAAACAMWAAA	STREME1	gst-A'	-	3367	3382	2.25e-05	0.0301	AAAAAAAAAAACAATC
	137	AAAACAAAACAMWAAA	STREME1	fth1a	-	672	687	2.26e-05	0.0301	ATAACAACACCAAAAA
	138	AAAACAAAACAMWAAA	STREME1	clic2	-	1542	1557	2.26e-05	0.0301	AAAACACACACACATA
	139	AAAACAAAACAMWAAA	STREME1	upp1	+	1245	1260	2.31e-05	0.0304	AAAAAACAAAACCAAA
	140	AAAACAAAACAMWAAA	STREME1	fth1a	+	4712	4727	2.32e-05	0.0304	AAAAAACAAAAAAAAA
	141	AAAACAAAACAMWAAA	STREME1	lrpap1	-	4206	4221	2.34e-05	0.0304	CAAACCAAAACAAACA
	142	AAAACAAAACAMWAAA	STREME1	isyna1	-	2294	2309	2.39e-05	0.0307	AAAACAAACAAACAAT
	143	AAAACAAAACAMWAAA	STREME1	cytochromeC	+	2649	2664	2.4e-05	0.0307	AAAATAAAATAATAAT
	144	AAAACAAAACAMWAAA	STREME1	gst-A'	+	1940	1955	2.41e-05	0.0307	AATATAAAATAATGCA
	145	AAAACAAAACAMWAAA	STREME1	lrpap1	+	1489	1504	2.46e-05	0.0311	AAAATCCAACAATCAA
	146	AAAACAAAACAMWAAA	STREME1	gstA-X1'	+	523	538	2.53e-05	0.0312	TAAACAATAACCTAAA
	147	AAAACAAAACAMWAAA	STREME1	gst-X5	+	541	556	2.53e-05	0.0312	TAAACAATAACCTAAA
	148	AAAACAAAACAMWAAA	STREME1	gst-A	+	2444	2459	2.56e-05	0.0312	AAAAAAAAACAACACC
	149	AAAACAAAACAMWAAA	STREME1	carbonylreductase1	+	1328	1343	2.57e-05	0.0312	AAAAACAAACAAAAAC
	150	AAAACAAAACAMWAAA	STREME1	glulb	+	1373	1388	2.6e-05	0.0312	AAAAAAAAAAAAAGTA
	151	AAAACAAAACAMWAAA	STREME1	lrpap1	-	4627	4642	2.65e-05	0.0312	AAAACTACACAGAAAA
	152	AAAACAAAACAMWAAA	STREME1	glulb	-	468	483	2.67e-05	0.0312	AAAAACAAAAAACAAA
	153	AAAACAAAACAMWAAA	STREME1	gstA-X3	-	3706	3721	2.7e-05	0.0312	AAAAAAAAAAAAAATC
	154	AAAACAAAACAMWAAA	STREME1	gstA-X3	-	4238	4253	2.71e-05	0.0312	AAAATAAAGTAATAAA
	155	AAAACAAAACAMWAAA	STREME1	scinla	-	4947	4962	2.71e-05	0.0312	AAAACAACAAACACCC
	156	AAAACAAAACAMWAAA	STREME1	gstA-X1'	-	1380	1395	2.73e-05	0.0312	AAAAATAAACAAAGAA
	157	AAAACAAAACAMWAAA	STREME1	gst-X5	-	1398	1413	2.73e-05	0.0312	AAAAATAAACAAAGAA
	158	AAAACAAAACAMWAAA	STREME1	gstA-X1'	-	756	771	2.74e-05	0.0312	AAAACAATATATGAAA
	159	AAAACAAAACAMWAAA	STREME1	gst-X5	-	774	789	2.74e-05	0.0312	AAAACAATATATGAAA
	160	AAAACAAAACAMWAAA	STREME1	gst-A	-	1249	1264	2.74e-05	0.0312	AAAACAATATATGAAA
	161	AAAACAAAACAMWAAA	STREME1	glula	+	92	107	2.74e-05	0.0312	AAATCTAAAAAACAAA
	162	AAAACAAAACAMWAAA	STREME1	gst-A'	+	803	818	2.81e-05	0.0318	CAAACAAACAAAACAC
	163	AAAACAAAACAMWAAA	STREME1	clic2	+	5241	5256	2.84e-05	0.0319	TAAATAAAACAAAAAC
	164	AAAACAAAACAMWAAA	STREME1	gst-A'	-	1631	1646	2.86e-05	0.0319	CAAATACAAACATAAA
	165	AAAACAAAACAMWAAA	STREME1	gst-A'	+	1945	1960	2.88e-05	0.0319	AAAATAATGCACAAAA
	166	AAAACAAAACAMWAAA	STREME1	clic2	-	4513	4528	2.89e-05	0.0319	AAAACCAAATAACAAT
	167	AAAACAAAACAMWAAA	STREME1	glulb	-	3552	3567	2.93e-05	0.0319	AAAACCAACAACAGCA
	168	AAAACAAAACAMWAAA	STREME1	lrpap1	-	4156	4171	2.93e-05	0.0319	AAAACTAAATGCCAAA
	169	AAAACAAAACAMWAAA	STREME1	gstA-X3	-	260	275	2.94e-05	0.0319	AAAAAAAAAAAATCTA
	170	AAAACAAAACAMWAAA	STREME1	arg2	-	1341	1356	3.01e-05	0.0324	AATAAAATAAAATAAA
	171	AAAACAAAACAMWAAA	STREME1	gstA-X1	+	1382	1397	3.02e-05	0.0324	AAAACAAAACCACTTC
	172	AAAACAAAACAMWAAA	STREME1	lrpap1	-	4210	4225	3.05e-05	0.0325	AAATCAAACCAAAACA
	173	AAAACAAAACAMWAAA	STREME1	arg2	-	1338	1353	3.13e-05	0.0332	AAAATAAAATAAAAAT
	174	AAAACAAAACAMWAAA	STREME1	glulb	-	5258	5273	3.17e-05	0.0333	AAAAAACAACAACAAC
	175	AAAACAAAACAMWAAA	STREME1	gstA-X1	+	4398	4413	3.17e-05	0.0333	AAAAACAAACAAAACA
	176	AAAACAAAACAMWAAA	STREME1	arg2	+	1074	1089	3.24e-05	0.0337	CATACAACCCCACAAA
	177	AAAACAAAACAMWAAA	STREME1	gst-A'	-	2995	3010	3.25e-05	0.0337	AATATAAAATCAAAGA
	178	AAAACAAAACAMWAAA	STREME1	upp1	+	1252	1267	3.29e-05	0.0337	AAAACCAAAAACCTTA
	179	AAAACAAAACAMWAAA	STREME1	carbonylreductase1	+	3433	3448	3.29e-05	0.0337	AATAGAATAAAATAAA
	180	AAAACAAAACAMWAAA	STREME1	clic2	+	1893	1908	3.32e-05	0.0338	CAAACACCAACACAAA
	181	AAAACAAAACAMWAAA	STREME1	gstA-X1'	-	2384	2399	3.35e-05	0.0338	AAAACAAAGCATAAAA
	182	AAAACAAAACAMWAAA	STREME1	gst-X5	-	2402	2417	3.35e-05	0.0338	AAAACAAAGCATAAAA
	183	AAAACAAAACAMWAAA	STREME1	lrpap1	-	4188	4203	3.39e-05	0.034	CAAACAAAAACAGGCA
	184	AAAACAAAACAMWAAA	STREME1	gstA-X1'	-	2284	2299	3.45e-05	0.0342	AAAACACCATAAGACA
	185	AAAACAAAACAMWAAA	STREME1	gst-X5	-	2302	2317	3.45e-05	0.0342	AAAACACCATAAGACA
	186	AAAACAAAACAMWAAA	STREME1	lrpap1	-	5210	5225	3.46e-05	0.0342	AAAACCACCACCAAAA
	187	AAAACAAAACAMWAAA	STREME1	carbonylreductase1	+	3448	3463	3.49e-05	0.0342	AATACTATATACAGTA
	188	AAAACAAAACAMWAAA	STREME1	carbonylreductase1	+	1333	1348	3.6e-05	0.0349	CAAACAAAAACCAGCC
	189	AAAACAAAACAMWAAA	STREME1	clic2	-	4289	4304	3.62e-05	0.0349	AAAAAAAAACAACCCA
	190	AAAACAAAACAMWAAA	STREME1	isyna1	-	2295	2310	3.63e-05	0.0349	AAAAACAAACAAACAA
	191	AAAACAAAACAMWAAA	STREME1	gst-A'	+	798	813	3.63e-05	0.0349	AAAAACAAACAAACAA
	192	AAAACAAAACAMWAAA	STREME1	glulb	+	3357	3372	3.66e-05	0.0349	AAAAGAAAAACAGAAA
	193	AAAACAAAACAMWAAA	STREME1	gst-A'	+	1935	1950	3.67e-05	0.0349	ACAACAATATAAAATA
	194	AAAACAAAACAMWAAA	STREME1	scinla	+	1140	1155	3.71e-05	0.0351	TAAATAAAACAATGTA
	195	AAAACAAAACAMWAAA	STREME1	arg2	-	4208	4223	3.92e-05	0.0369	AATAAAATAAAAAAAA
	196	AAAACAAAACAMWAAA	STREME1	lrpap1	-	3319	3334	3.94e-05	0.0369	ACAACACAACAACAGA
	197	AAAACAAAACAMWAAA	STREME1	gstA-X1	+	1657	1672	3.97e-05	0.037	AATAAAACAAAATAAA
	198	AAAACAAAACAMWAAA	STREME1	lrpap1	-	4211	4226	4.1e-05	0.038	CAAATCAAACCAAAAC
	199	AAAACAAAACAMWAAA	STREME1	gstA-X1	-	3699	3714	4.2e-05	0.0385	AACATAAAACAAACAA
	200	AAAACAAAACAMWAAA	STREME1	gstA-X1'	+	234	249	4.22e-05	0.0385	AAAACAATCAATAAAA
	201	AAAACAAAACAMWAAA	STREME1	gst-X5	+	252	267	4.22e-05	0.0385	AAAACAATCAATAAAA
	202	AAAACAAAACAMWAAA	STREME1	gstA-X1	+	1376	1391	4.25e-05	0.0386	AAAAAAAAAACAAAAC
	203	AAAACAAAACAMWAAA	STREME1	arg2	-	4205	4220	4.31e-05	0.039	AAAATAAAAAAAACCC
	204	AAAACAAAACAMWAAA	STREME1	glula	-	5202	5217	4.4e-05	0.0392	CATACAAAGCAATCAA
	205	AAAACAAAACAMWAAA	STREME1	isyna1	-	3609	3624	4.44e-05	0.0392	AAAACACACACACACA
	206	AAAACAAAACAMWAAA	STREME1	lrpap1	-	4015	4030	4.44e-05	0.0392	AAAACACACACACACA
	207	AAAACAAAACAMWAAA	STREME1	glula	-	5621	5636	4.44e-05	0.0392	AAAACACACACACACA
	208	AAAACAAAACAMWAAA	STREME1	gstA-X1	+	323	338	4.44e-05	0.0392	CAAACACACAAACACA
	209	AAAACAAAACAMWAAA	STREME1	scinla	+	2210	2225	4.49e-05	0.0394	AAAACAACACCAGTAA
	210	AAAACAAAACAMWAAA	STREME1	glulb	-	898	913	4.56e-05	0.0398	AAAATAAATAAAAATA
	211	AAAACAAAACAMWAAA	STREME1	scinla	-	3339	3354	4.63e-05	0.0402	TAAATAAAATACAATA
	212	AAAACAAAACAMWAAA	STREME1	lrpap1	-	4170	4185	4.67e-05	0.0402	CAGATAAAAAACTAAA
	213	AAAACAAAACAMWAAA	STREME1	gst-A	-	4656	4671	4.67e-05	0.0402	AAAACATAATAAGAGA
	214	AAAACAAAACAMWAAA	STREME1	gst-A	+	2447	2462	4.69e-05	0.0402	AAAAAACAACACCATC
	215	AAAACAAAACAMWAAA	STREME1	gst-A'	-	20	35	4.75e-05	0.0403	CAAATTAAAAACACAA
	216	AAAACAAAACAMWAAA	STREME1	gst-A	-	1868	1883	4.75e-05	0.0403	CAAATTAAAAACACAA
	217	AAAACAAAACAMWAAA	STREME1	isyna1	+	3090	3105	4.76e-05	0.0403	AATACACAAGACAGAA
	218	AAAACAAAACAMWAAA	STREME1	scinla	-	4226	4241	4.8e-05	0.0404	AAAATATAATACAATA
	219	AAAACAAAACAMWAAA	STREME1	isyna1	+	4746	4761	4.9e-05	0.0405	AATACGAAAAACAGTA
	220	AAAACAAAACAMWAAA	STREME1	gstA-X1	-	4540	4555	4.92e-05	0.0405	AAAATAATACACAATG
	221	AAAACAAAACAMWAAA	STREME1	gstA-X1	+	4853	4868	4.92e-05	0.0405	TAAAAAAAACAAAAAA
	222	AAAACAAAACAMWAAA	STREME1	clic2	+	5803	5818	4.92e-05	0.0405	AATAGCAAAAACAAAA
	223	AAAACAAAACAMWAAA	STREME1	lrpap1	+	3864	3879	4.93e-05	0.0405	GAAACAATATACTCAA
	224	AAAACAAAACAMWAAA	STREME1	carbonylreductase1	-	4982	4997	4.95e-05	0.0405	CAAACACAAAACCCTC
	225	AAAACAAAACAMWAAA	STREME1	scinla	+	4901	4916	4.97e-05	0.0405	AAAACGAAAGAAAAAA
	226	AAAACAAAACAMWAAA	STREME1	isyna1	-	2297	2312	5.08e-05	0.0412	AAAAAAACAAACAAAC
	227	AAAACAAAACAMWAAA	STREME1	gstA-X1	-	2055	2070	5.09e-05	0.0412	CAAATAAAATAGTAAA
	228	AAAACAAAACAMWAAA	STREME1	carbonylreductase1	-	5461	5476	5.13e-05	0.0413	AAAACAATAACATTTA
	229	AAAACAAAACAMWAAA	STREME1	upp1	+	1246	1261	5.25e-05	0.0413	AAAAACAAAACCAAAA
	230	AAAACAAAACAMWAAA	STREME1	scinla	-	4558	4573	5.26e-05	0.0413	AACACAACAAAAAGAA
	231	AAAACAAAACAMWAAA	STREME1	gst-A'	-	353	368	5.28e-05	0.0413	AAAAAAAAAAAAAAGC
	232	AAAACAAAACAMWAAA	STREME1	gstA-X1	-	3392	3407	5.28e-05	0.0413	AAAAAAAAAGAAAAAA
	233	AAAACAAAACAMWAAA	STREME1	glula	+	425	440	5.28e-05	0.0413	AAAAAAAAAAAAAAGC
	234	AAAACAAAACAMWAAA	STREME1	scinla	+	4512	4527	5.3e-05	0.0413	AAACCAAAAACAAACA
	235	AAAACAAAACAMWAAA	STREME1	carbonylreductase1	-	4379	4394	5.4e-05	0.0413	AAATTAAAACAAAATC
	236	AAAACAAAACAMWAAA	STREME1	gstA-X1'	+	968	983	5.42e-05	0.0413	AAAACACAAGCAGAAA
	237	AAAACAAAACAMWAAA	STREME1	gst-X5	+	986	1001	5.42e-05	0.0413	AAAACACAAGCAGAAA
	238	AAAACAAAACAMWAAA	STREME1	isyna1	+	4633	4648	5.42e-05	0.0413	AAAATAAAATAAACGC
	239	AAAACAAAACAMWAAA	STREME1	s100w	-	2414	2429	5.44e-05	0.0413	CAAAAACAAAACAAAA
	240	AAAACAAAACAMWAAA	STREME1	lrpap1	-	4258	4273	5.44e-05	0.0413	AATATAAAACCCATAA
	241	AAAACAAAACAMWAAA	STREME1	aldehyde	-	3459	3474	5.46e-05	0.0413	CAAATCATACAAAAGA
	242	AAAACAAAACAMWAAA	STREME1	glulb	-	462	477	5.47e-05	0.0413	AAAAAACAAAACAAAC
	243	AAAACAAAACAMWAAA	STREME1	s100w	-	5014	5029	5.49e-05	0.0413	CAAACACAAACCAGCA
	244	AAAACAAAACAMWAAA	STREME1	gstA-X3	+	183	198	5.49e-05	0.0413	TAAACTAAACCCAGAA
	245	AAAACAAAACAMWAAA	STREME1	cytochromeC	+	2997	3012	5.51e-05	0.0413	CAAATAAATAAATAAA
	246	AAAACAAAACAMWAAA	STREME1	glula	+	810	825	5.55e-05	0.0414	CATATACACCACCAAA
	247	AAAACAAAACAMWAAA	STREME1	fth1a	+	1179	1194	5.59e-05	0.0414	AAAACTACACACAATG
	248	AAAACAAAACAMWAAA	STREME1	fth1a	+	4414	4429	5.59e-05	0.0414	AAAACTACACACAATG
	249	AAAACAAAACAMWAAA	STREME1	carbonylreductase1	+	3480	3495	5.63e-05	0.0415	AATATACAATAAGATA
	250	AAAACAAAACAMWAAA	STREME1	gst-A	+	1644	1659	5.73e-05	0.0419	AATAATAAATAATAAA
	251	AAAACAAAACAMWAAA	STREME1	glulb	-	472	487	5.75e-05	0.0419	AAACAAAAACAAAAAA
	252	AAAACAAAACAMWAAA	STREME1	fth1a	+	4709	4724	5.75e-05	0.0419	ACAAAAAAACAAAAAA
	253	AAAACAAAACAMWAAA	STREME1	carbonylreductase1	+	3470	3485	5.79e-05	0.042	AATAGAATAAAATATA
	254	AAAACAAAACAMWAAA	STREME1	clic2	-	1052	1067	5.94e-05	0.0429	CACACAAAATAAAACA
	255	AAAACAAAACAMWAAA	STREME1	gst-A'	+	1579	1594	5.97e-05	0.043	AAAATAAAAAGAGAAA
	256	AAAACAAAACAMWAAA	STREME1	isyna1	-	2318	2333	6e-05	0.043	AAAAAAACAACAAAAA
	257	AAAACAAAACAMWAAA	STREME1	gst-A'	-	1613	1628	6.06e-05	0.0432	ACAACAACAACAAAAA
	258	AAAACAAAACAMWAAA	STREME1	glula	-	593	608	6.15e-05	0.0435	GATACAATACAACACA
	259	AAAACAAAACAMWAAA	STREME1	isyna1	+	2875	2890	6.2e-05	0.0435	ACAACAACACAAACTA
	260	AAAACAAAACAMWAAA	STREME1	carbonylreductase1	+	3468	3483	6.2e-05	0.0435	AAAATAGAATAAAATA
	261	AAAACAAAACAMWAAA	STREME1	s100w	-	2413	2428	6.23e-05	0.0435	AAAAACAAAACAAAAA
	262	AAAACAAAACAMWAAA	STREME1	lrpap1	-	2942	2957	6.26e-05	0.0435	GAAACTAAAAAAAGAA
	263	AAAACAAAACAMWAAA	STREME1	gst-A	+	2438	2453	6.26e-05	0.0435	AAAAACAAAAAAAAAC
	264	AAAACAAAACAMWAAA	STREME1	fth1a	+	1271	1286	6.29e-05	0.0435	CAAACAAAAACAACCC
	265	AAAACAAAACAMWAAA	STREME1	fth1a	+	4506	4521	6.29e-05	0.0435	CAAACAAAAACAACCC
	266	AAAACAAAACAMWAAA	STREME1	carbonylreductase1	-	5466	5481	6.33e-05	0.0436	CACATAAAACAATAAC
	267	AAAACAAAACAMWAAA	STREME1	carbonylreductase1	+	3389	3404	6.42e-05	0.0436	AGAATAAAATAAAATA
	268	AAAACAAAACAMWAAA	STREME1	carbonylreductase1	+	3436	3451	6.42e-05	0.0436	AGAATAAAATAAAATA
	269	AAAACAAAACAMWAAA	STREME1	carbonylreductase1	+	1327	1342	6.44e-05	0.0436	AAAAAACAAACAAAAA
	270	AAAACAAAACAMWAAA	STREME1	gst-A	+	2437	2452	6.44e-05	0.0436	CAAAAACAAAAAAAAA
	271	AAAACAAAACAMWAAA	STREME1	fth1a	+	4710	4725	6.44e-05	0.0436	CAAAAAAACAAAAAAA
	272	AAAACAAAACAMWAAA	STREME1	gstA-X1	+	4854	4869	6.48e-05	0.0437	AAAAAAAACAAAAAAC
	273	AAAACAAAACAMWAAA	STREME1	gst-A'	-	3365	3380	6.5e-05	0.0437	AAAAAAAAACAATCCC
	274	AAAACAAAACAMWAAA	STREME1	gstA-X1'	-	4722	4737	6.6e-05	0.044	CAAACAAAACAGTTAA
	275	AAAACAAAACAMWAAA	STREME1	gst-X5	-	4740	4755	6.6e-05	0.044	CAAACAAAACAGTTAA
	276	AAAACAAAACAMWAAA	STREME1	glulb	+	561	576	6.64e-05	0.0442	AATAGAACAAAACAAA
	277	AAAACAAAACAMWAAA	STREME1	scinla	-	3765	3780	6.69e-05	0.0442	CATACACAATCCTATC
	278	AAAACAAAACAMWAAA	STREME1	arg2	-	4555	4570	6.69e-05	0.0442	AAAAAAAACCCCTCAA
	279	AAAACAAAACAMWAAA	STREME1	carbonylreductase1	+	3394	3409	6.82e-05	0.0444	AAAATAAAATAAGAAT
	280	AAAACAAAACAMWAAA	STREME1	scinla	+	1145	1160	6.85e-05	0.0444	AAAACAATGTAAAACA
	281	AAAACAAAACAMWAAA	STREME1	arg2	+	1827	1842	6.85e-05	0.0444	AAAAAAAATCAATATA
	282	AAAACAAAACAMWAAA	STREME1	glula	-	514	529	6.87e-05	0.0444	AATAGACAACAAAAAC
	283	AAAACAAAACAMWAAA	STREME1	clic2	-	2326	2341	6.87e-05	0.0444	CAAATAACACCCCATC
	284	AAAACAAAACAMWAAA	STREME1	clic2	+	5783	5798	6.87e-05	0.0444	AATATAAAATAAGGCA
	285	AAAACAAAACAMWAAA	STREME1	clic2	-	4465	4480	6.95e-05	0.0447	AAAACACAATACATGA
	286	AAAACAAAACAMWAAA	STREME1	glulb	-	463	478	7.06e-05	0.0451	CAAAAAACAAAACAAA
	287	AAAACAAAACAMWAAA	STREME1	clic2	-	404	419	7.13e-05	0.0451	CAAACAAACACATGTC
	288	AAAACAAAACAMWAAA	STREME1	gst-A'	-	1903	1918	7.19e-05	0.0451	AAAGCAACAAAACAAC
	289	AAAACAAAACAMWAAA	STREME1	glulb	-	2319	2334	7.19e-05	0.0451	AAAAAAAAAAAAAGTC
	290	AAAACAAAACAMWAAA	STREME1	glulb	+	551	566	7.19e-05	0.0451	AAACCAACATAATAGA
	291	AAAACAAAACAMWAAA	STREME1	scinla	+	1125	1140	7.19e-05	0.0451	AAAACAATATAACAGT
	292	AAAACAAAACAMWAAA	STREME1	carbonylreductase1	+	3475	3490	7.19e-05	0.0451	AATAAAATATACAATA
	293	AAAACAAAACAMWAAA	STREME1	glulb	-	159	174	7.32e-05	0.0455	CAAAGAAACTACAAAA
	294	AAAACAAAACAMWAAA	STREME1	gstA-X3	-	262	277	7.39e-05	0.0455	CAAAAAAAAAAAAATC
	295	AAAACAAAACAMWAAA	STREME1	isyna1	-	2312	2327	7.42e-05	0.0455	ACAACAAAAAAAACGA
	296	AAAACAAAACAMWAAA	STREME1	fth1a	+	1544	1559	7.42e-05	0.0455	CAAACCACAAACAGGA
	297	AAAACAAAACAMWAAA	STREME1	fth1a	+	4796	4811	7.42e-05	0.0455	CAAACCACAAACAGGA
	298	AAAACAAAACAMWAAA	STREME1	fth1a	+	1267	1282	7.45e-05	0.0455	GAAACAAACAAAAACA
	299	AAAACAAAACAMWAAA	STREME1	fth1a	+	4502	4517	7.45e-05	0.0455	GAAACAAACAAAAACA
	300	AAAACAAAACAMWAAA	STREME1	isyna1	-	2326	2341	7.47e-05	0.0455	AAAAGTAAAAAAAAAC
	301	AAAACAAAACAMWAAA	STREME1	carbonylreductase1	+	1321	1336	7.47e-05	0.0455	AATTTAAAAAAACAAA
	302	AAAACAAAACAMWAAA	STREME1	gst-A'	+	812	827	7.53e-05	0.0458	AAAACACCAAAAATAA
	303	AAAACAAAACAMWAAA	STREME1	gstA-X1'	+	567	582	7.65e-05	0.0461	AAAATTAAACAGGAAA
	304	AAAACAAAACAMWAAA	STREME1	gst-X5	+	585	600	7.65e-05	0.0461	AAAATTAAACAGGAAA
	305	AAAACAAAACAMWAAA	STREME1	gstA-X1	-	5776	5791	7.67e-05	0.0461	ATAACCATACACTGTA
	306	AAAACAAAACAMWAAA	STREME1	glula	+	376	391	7.7e-05	0.0462	AAAACAGACAAAAAGA
	307	AAAACAAAACAMWAAA	STREME1	gstA-X1	-	3702	3717	7.86e-05	0.047	AAAAACATAAAACAAA
	308	AAAACAAAACAMWAAA	STREME1	upp1	+	558	573	7.89e-05	0.047	AAAAAACAAAAAAAGA
	309	AAAACAAAACAMWAAA	STREME1	glulb	-	479	494	7.93e-05	0.047	ACAATAAAAACAAAAA
	310	AAAACAAAACAMWAAA	STREME1	fth1a	-	661	676	7.93e-05	0.047	AAAAACAACCAATGAA
	311	AAAACAAAACAMWAAA	STREME1	fth1a	-	100	115	8.08e-05	0.0476	AAAACACACACAGACA
	312	AAAACAAAACAMWAAA	STREME1	clic2	-	3407	3422	8.16e-05	0.048	AATTCAACCCAAAAAA
	313	AAAACAAAACAMWAAA	STREME1	arg2	-	4213	4228	8.19e-05	0.048	CATAAAATAAAATAAA
	314	AAAACAAAACAMWAAA	STREME1	gst-A	-	4696	4711	8.21e-05	0.048	AACATTAAACACTGAA
	315	AAAACAAAACAMWAAA	STREME1	gstA-X1'	-	1385	1400	8.38e-05	0.0485	AAAATAAAAATAAACA
	316	AAAACAAAACAMWAAA	STREME1	gst-X5	-	1403	1418	8.38e-05	0.0485	AAAATAAAAATAAACA
	317	AAAACAAAACAMWAAA	STREME1	gstA-X1	+	4316	4331	8.38e-05	0.0485	AAAACACACAAAAAAT
	318	AAAACAAAACAMWAAA	STREME1	gstA-X1	-	3694	3709	8.47e-05	0.0489	AAAACAAACAAAACAG
	319	AAAACAAAACAMWAAA	STREME1	lrpap1	+	2879	2894	8.67e-05	0.0499	AAAAACAAAAAAACAA
	320	AAAACAAAACAMWAAA	STREME1	carbonylreductase1	-	1872	1887	8.84e-05	0.0505	CAAACAAACCACAGTT
	321	AAAACAAAACAMWAAA	STREME1	isyna1	+	4623	4638	8.84e-05	0.0505	AAGAAAAAACAAAATA
	322	AAAACAAAACAMWAAA	STREME1	glulb	-	1413	1428	8.88e-05	0.0506	AGTACAAAACTATAAA
	323	AAAACAAAACAMWAAA	STREME1	clic2	-	4288	4303	8.93e-05	0.0507	AAAAAAAACAACCCAA
	324	AAAACAAAACAMWAAA	STREME1	glula	+	933	948	9.04e-05	0.0511	AAAACAACATGATGTA
	325	AAAACAAAACAMWAAA	STREME1	gstA-X1	-	3704	3719	9.08e-05	0.0511	AAAAAAACATAAAACA
	326	AAAACAAAACAMWAAA	STREME1	scinla	-	4214	4229	9.08e-05	0.0511	AATACAATAAATACAA
	327	AAAACAAAACAMWAAA	STREME1	lrpap1	+	4377	4392	9.14e-05	0.0513	AAAACAAAAAGTCAAA
	328	AAAACAAAACAMWAAA	STREME1	glulb	+	579	594	9.26e-05	0.0518	AAAACAAACAAAAGTT
	329	AAAACAAAACAMWAAA	STREME1	isyna1	-	2316	2331	9.29e-05	0.0518	AAAAACAACAAAAAAA
	330	AAAACAAAACAMWAAA	STREME1	gst-A	+	4453	4468	9.38e-05	0.0522	AATACAAAGAAAGAGA
	331	AAAACAAAACAMWAAA	STREME1	lrpap1	-	4263	4278	9.47e-05	0.0525	AATATAATATAAAACC
	332	AAAACAAAACAMWAAA	STREME1	fth1a	+	5813	5828	9.51e-05	0.0525	AAAACACAGTAAAAGA
	333	AAAACAAAACAMWAAA	STREME1	isyna1	-	3534	3549	9.63e-05	0.0528	CAAATAAACTAAGGAA
	334	AAAACAAAACAMWAAA	STREME1	gstA-X1	-	1351	1366	9.66e-05	0.0528	AAAACTTCAAACTATA
	335	AAAACAAAACAMWAAA	STREME1	glula	-	516	531	9.69e-05	0.0528	AAAATAGACAACAAAA
	336	AAAACAAAACAMWAAA	STREME1	isyna1	-	2325	2340	9.69e-05	0.0528	AAAGTAAAAAAAAACA
	337	AAAACAAAACAMWAAA	STREME1	glulb	-	456	471	9.73e-05	0.0528	CAAAACAAACAAACAA
	338	AAAACAAAACAMWAAA	STREME1	lrpap1	-	4201	4216	9.73e-05	0.0528	CAAAACAAACAAACAA
	339	AAAACAAAACAMWAAA	STREME1	clic2	-	409	424	9.78e-05	0.0528	AAAAACAAACAAACAC
	340	AAAACAAAACAMWAAA	STREME1	upp1	+	1244	1259	9.78e-05	0.0528	AAAAAAACAAAACCAA
	341	AAAACAAAACAMWAAA	STREME1	isyna1	-	4421	4436	9.86e-05	0.053	AAAACCCCCCAAACAA
	342	AAAACAAAACAMWAAA	STREME1	clic2	-	5504	5519	9.89e-05	0.0531	CAAACACCCCAACATC

## Sheet: STREMRE1_FIMO_hits
	#	Motif ID	Alt ID	Sequence Name	Strand	Start	End	p-value	q-value	Matched Sequence
	1	AAAACAAAACAMWAAA	STREME1	glulb	-	467	482	1.44e-08	0.000971	AAAACAAAAAACAAAA
	2	AAAACAAAACAMWAAA	STREME1	fth1a	+	4714	4729	2.49e-08	0.000971	AAAACAAAAAAAAAAA
	3	AAAACAAAACAMWAAA	STREME1	gst-A'	+	807	822	3.2e-08	0.000971	CAAACAAAACACCAAA
	4	AAAACAAAACAMWAAA	STREME1	gstA-X3	-	272	287	3.32e-08	0.000971	AAAACAAAACCAAAAA
	5	AAAACAAAACAMWAAA	STREME1	upp1	+	1247	1262	3.32e-08	0.000971	AAAACAAAACCAAAAA
	6	AAAACAAAACAMWAAA	STREME1	s100w	-	2412	2427	3.48e-08	0.000971	AAAACAAAACAAAAAC
	7	AAAACAAAACAMWAAA	STREME1	lrpap1	+	2880	2895	3.71e-08	0.000971	AAAACAAAAAAACAAA
	8	AAAACAAAACAMWAAA	STREME1	glulb	+	569	584	5.36e-08	0.00119	AAAACAAAACAAAACA
	9	AAAACAAAACAMWAAA	STREME1	glulb	-	460	475	6.46e-08	0.00119	AAAACAAAACAAACAA
	10	AAAACAAAACAMWAAA	STREME1	glulb	+	574	589	6.46e-08	0.00119	AAAACAAAACAAACAA
	11	AAAACAAAACAMWAAA	STREME1	gstA-X1	+	4858	4873	7.7e-08	0.00128	AAAACAAAAAACCATA
	12	AAAACAAAACAMWAAA	STREME1	gstA-X1'	-	2289	2304	9.33e-08	0.00132	CAAACAAAACACCATA
	13	AAAACAAAACAMWAAA	STREME1	gst-X5	-	2307	2322	9.33e-08	0.00132	CAAACAAAACACCATA
	14	AAAACAAAACAMWAAA	STREME1	isyna1	+	4628	4643	1.18e-07	0.00148	AAAACAAAATAAAATA
	15	AAAACAAAACAMWAAA	STREME1	scinla	-	4219	4234	1.21e-07	0.00148	AATACAATACAATAAA
	16	AAAACAAAACAMWAAA	STREME1	gst-A	-	2765	2780	1.31e-07	0.00151	AAAACAAAACAATGAC
	17	AAAACAAAACAMWAAA	STREME1	glulb	-	473	488	1.77e-07	0.00188	AAAACAAAAACAAAAA
	18	AAAACAAAACAMWAAA	STREME1	glula	+	5594	5609	1.92e-07	0.00188	AAAACAAAACAATGGA
	19	AAAACAAAACAMWAAA	STREME1	lrpap1	-	4163	4178	1.95e-07	0.00188	AAAACTAAAAACTAAA
	20	AAAACAAAACAMWAAA	STREME1	gstA-X1	+	4403	4418	2.25e-07	0.00207	CAAACAAAACAAAAAC
	21	AAAACAAAACAMWAAA	STREME1	gst-A	+	2439	2454	2.68e-07	0.00234	AAAACAAAAAAAAACA
	22	AAAACAAAACAMWAAA	STREME1	gst-A'	-	13	28	3.19e-07	0.00266	AAAACACAACAAGAAA
	23	AAAACAAAACAMWAAA	STREME1	isyna1	-	2315	2330	3.38e-07	0.0027	AAAACAACAAAAAAAA
	24	AAAACAAAACAMWAAA	STREME1	gstA-X3	-	267	282	3.63e-07	0.00277	AAAACCAAAAAAAAAA
	25	AAAACAAAACAMWAAA	STREME1	gst-A	-	1861	1876	4.38e-07	0.00321	AAAACACAACAAAGAA
	26	AAAACAAAACAMWAAA	STREME1	glulb	-	455	470	4.91e-07	0.00322	AAAACAAACAAACAAA
	27	AAAACAAAACAMWAAA	STREME1	gst-A'	+	799	814	4.91e-07	0.00322	AAAACAAACAAACAAA
	28	AAAACAAAACAMWAAA	STREME1	lrpap1	-	4200	4215	4.91e-07	0.00322	AAAACAAACAAACAAA
	29	AAAACAAAACAMWAAA	STREME1	clic2	-	4518	4533	5.66e-07	0.00358	CAAACAAAACCAAATA
	30	AAAACAAAACAMWAAA	STREME1	arg2	-	4210	4225	7.27e-07	0.00444	AAAATAAAATAAAAAA
	31	AAAACAAAACAMWAAA	STREME1	carbonylreductase1	+	3441	3456	8.8e-07	0.00521	AAAATAAAATACTATA
	32	AAAACAAAACAMWAAA	STREME1	glula	-	588	603	1.05e-06	0.00599	AATACAACACAAGAAA
	33	AAAACAAAACAMWAAA	STREME1	clic2	-	1047	1062	1.1e-06	0.00599	AAAATAAAACAACACA
	34	AAAACAAAACAMWAAA	STREME1	arg2	+	1780	1795	1.11e-06	0.00599	AATACAATACAATCAA
	35	AAAACAAAACAMWAAA	STREME1	clic2	-	4294	4309	1.26e-06	0.00643	CAAACAAAAAAAAACA
	36	AAAACAAAACAMWAAA	STREME1	scinla	+	4511	4526	1.27e-06	0.00643	AAAACCAAAAACAAAC
	37	AAAACAAAACAMWAAA	STREME1	upp1	-	1094	1109	1.3e-06	0.00643	GAAACAAAACAAAAAA
	38	AAAACAAAACAMWAAA	STREME1	s100w	+	2590	2605	1.45e-06	0.00702	AAAACTAAAAACAAAC
	39	AAAACAAAACAMWAAA	STREME1	glulb	-	447	462	1.51e-06	0.00711	CAAACAAAAAAAACAA
	40	AAAACAAAACAMWAAA	STREME1	glulb	-	451	466	1.68e-06	0.00772	CAAACAAACAAAAAAA
	41	AAAACAAAACAMWAAA	STREME1	isyna1	-	2320	2335	1.78e-06	0.00797	AAAAAAAAACAACAAA
	42	AAAACAAAACAMWAAA	STREME1	s100w	-	2407	2422	2.03e-06	0.00854	AAAACAAAAACAAATC
	43	AAAACAAAACAMWAAA	STREME1	fth1a	-	1859	1874	2.05e-06	0.00854	AATACACAAAAATATA
	44	AAAACAAAACAMWAAA	STREME1	clic2	+	4543	4558	2.06e-06	0.00854	AAAATAAAATAACATA
	45	AAAACAAAACAMWAAA	STREME1	lrpap1	-	4196	4211	2.09e-06	0.00854	CAAACAAACAAACAAA
	46	AAAACAAAACAMWAAA	STREME1	s100w	+	2597	2612	2.28e-06	0.00894	AAAACAAACTAAAAAC
	47	AAAACAAAACAMWAAA	STREME1	upp1	-	711	726	2.29e-06	0.00894	AAAACCCAACAACATA
	48	AAAACAAAACAMWAAA	STREME1	upp1	-	1089	1104	2.52e-06	0.00964	AAAACAAAAAAATTAA
	49	AAAACAAAACAMWAAA	STREME1	gstA-X1	+	4399	4414	2.64e-06	0.00986	AAAACAAACAAAACAA
	50	AAAACAAAACAMWAAA	STREME1	aldehyde	+	554	569	2.69e-06	0.00986	CATACAATACAACATA
	51	AAAACAAAACAMWAAA	STREME1	clic2	-	408	423	2.77e-06	0.00998	AAAACAAACAAACACA
