# Supplementary material for: Prediction and Experimental Validation of a New Salinity-Responsive Cis-Regulatory Element (CRE) in a Tilapia Cell Line
Source: Life (Basel). 2022 May 25;12(6):787. doi: 10.3390/life12060787 (PMC9225295; doi:10.3390/life12060787)
Supplement: Supplementary file 1 [file life-12-00787-s001.zip › Table S3.xlsx]

## Sheet: STREME_1 TOMTOM
	Database	Used	Matched
	uniprobe_mouse	386	12
	JASPAR2022_CORE_vertebrates_non-redundant	838	13
	Total number of matches=		25
	Name	Database	p-value	e-value	q-value	overlap	offset	orientation
1	UP00061_2 (Foxl1_secondary)	uniprobe_mouse	1.65e-05	0.0202	0.0403	16	0	Normal
2	MA0757.1 (MA0757.1.ONECUT3)	JASPAR2022_CORE_vertebrates_non-redundant	0.000341	0.417	0.222	14	-2	Normal
3	MA0679.2 (MA0679.2.ONECUT1)	JASPAR2022_CORE_vertebrates_non-redundant	0.000358	0.438	0.222	14	-2	Normal
4	MA0442.2 (MA0442.2.SOX10)	JASPAR2022_CORE_vertebrates_non-redundant	0.000364	0.446	0.222	11	0	Normal
5	UP00037_1 (Zfp105_primary)	uniprobe_mouse	0.000615	0.753	0.3	14	-2	Normal
6	MA1152.1 (MA1152.1.SOX15)	JASPAR2022_CORE_vertebrates_non-redundant	0.000974	1.19	0.367	10	0	Reverse Complement
7	UP00077_2 (Srf_secondary)	uniprobe_mouse	0.00123	1.5	0.367	15	2	Normal
8	UP00062_1 (Sox4_primary)	uniprobe_mouse	0.00123	1.5	0.367	14	3	Normal
9	UP00034_1 (Sox7_primary)	uniprobe_mouse	0.00135	1.65	0.367	16	0	Normal
10	MA0901.2 (MA0901.2.HOXB13)	JASPAR2022_CORE_vertebrates_non-redundant	0.00173	2.12	0.423	14	-1	Normal
11	UP00030_1 (Sox11_primary)	uniprobe_mouse	0.00228	2.79	0.506	14	3	Normal
12	UP00051_1 (Sox8_primary)	uniprobe_mouse	0.00284	3.47	0.577	14	-2	Reverse Complement
13	UP00069_1 (Sox1_primary)	uniprobe_mouse	0.00327	4	0.6	15	-1	Normal
14	UP00073_1 (Foxa2_primary)	uniprobe_mouse	0.00352	4.31	0.6	16	1	Normal
15	UP00039_1 (Foxj3_primary)	uniprobe_mouse	0.00392	4.8	0.6	16	1	Normal
16	MA1125.1 (MA1125.1.ZNF384)	JASPAR2022_CORE_vertebrates_non-redundant	0.00393	4.81	0.6	12	0	Normal
17	MA0851.1 (MA0851.1.Foxj3)	JASPAR2022_CORE_vertebrates_non-redundant	0.00436	5.33	0.612	16	1	Normal
18	UP00041_1 (Foxj1_primary)	uniprobe_mouse	0.00451	5.52	0.612	15	-1	Normal
19	MA0030.1 (MA0030.1.FOXF2)	JASPAR2022_CORE_vertebrates_non-redundant	0.00502	6.14	0.618	13	1	Normal
20	MA0051.1 (MA0051.1.IRF2)	JASPAR2022_CORE_vertebrates_non-redundant	0.00506	6.19	0.618	16	2	Normal
21	MA1709.1 (MA1709.1.ZIM3)	JASPAR2022_CORE_vertebrates_non-redundant	0.00562	6.88	0.654	14	1	Normal
22	MA0040.1 (MA0040.1.Foxq1)	JASPAR2022_CORE_vertebrates_non-redundant	0.00605	7.41	0.672	11	-3	Reverse Complement
23	UP00145_1 (Barhl2_3868.1)	uniprobe_mouse	0.0072	8.81	0.746	15	1	Normal
24	MA0041.2 (MA0041.2.FOXD3)	JASPAR2022_CORE_vertebrates_non-redundant	0.00757	9.27	0.746	15	-1	Normal
25	MA2034.1 (MA2034.1.Bcl11B)	JASPAR2022_CORE_vertebrates_non-redundant	0.00784	9.6	0.746	13	-3	Normal

## Sheet: STREME_2 TOMTOM
	Database	Used	Matched
	uniprobe_mouse	386	13
	JASPAR2022_CORE_vertebrates_non-redundant	838	15
	Total number of matches=		28
	Name	Database	p-value	e-value	q-value	overlap	offset	orientation
1	UP00097_2 (Mtf1_secondary)	uniprobe_mouse	3.63e-06	0.00444	0.00886	14	0	Normal
2	MA1125.1 (MA1125.1.ZNF384)	JASPAR2022_CORE_vertebrates_non-redundant	0.000264	0.323	0.322	12	0	Normal
3	MA2034.1 (MA2034.1.Bcl11B)	JASPAR2022_CORE_vertebrates_non-redundant	0.000625	0.765	0.374	14	0	Normal
4	MA0679.2 (MA0679.2.ONECUT1)	JASPAR2022_CORE_vertebrates_non-redundant	0.00063	0.771	0.374	14	0	Normal
5	UP00074_1 (Isgf3g_primary)	uniprobe_mouse	0.000799	0.978	0.374	14	1	Normal
6	MA0757.1 (MA0757.1.ONECUT3)	JASPAR2022_CORE_vertebrates_non-redundant	0.000991	1.21	0.374	14	0	Normal
7	UP00039_1 (Foxj3_primary)	uniprobe_mouse	0.00108	1.32	0.374	14	0	Normal
8	MA0851.1 (MA0851.1.Foxj3)	JASPAR2022_CORE_vertebrates_non-redundant	0.00123	1.5	0.374	14	0	Normal
9	UP00077_2 (Srf_secondary)	uniprobe_mouse	0.00139	1.7	0.376	14	3	Normal
10	UP00037_1 (Zfp105_primary)	uniprobe_mouse	0.00212	2.6	0.496	14	0	Normal
11	UP00034_1 (Sox7_primary)	uniprobe_mouse	0.00223	2.73	0.496	14	3	Normal
12	MA0508.3 (MA0508.3.PRDM1)	JASPAR2022_CORE_vertebrates_non-redundant	0.00288	3.52	0.557	11	-2	Reverse Complement
13	MA0036.3 (MA0036.3.GATA2)	JASPAR2022_CORE_vertebrates_non-redundant	0.00314	3.84	0.557	11	-3	Reverse Complement
14	UP00073_1 (Foxa2_primary)	uniprobe_mouse	0.00332	4.07	0.557	14	0	Normal
15	MA1623.1 (MA1623.1.Stat2)	JASPAR2022_CORE_vertebrates_non-redundant	0.00353	4.32	0.557	12	1	Normal
16	UP00025_1 (Foxk1_primary)	uniprobe_mouse	0.00374	4.58	0.557	14	0	Normal
17	MA0442.2 (MA0442.2.SOX10)	JASPAR2022_CORE_vertebrates_non-redundant	0.00388	4.75	0.557	11	-2	Normal
18	UP00100_1 (Gata6_primary)	uniprobe_mouse	0.00454	5.55	0.615	14	0	Normal
19	UP00073_2 (Foxa2_secondary)	uniprobe_mouse	0.00499	6.1	0.641	13	-1	Normal
20	UP00061_1 (Foxl1_primary)	uniprobe_mouse	0.0057	6.98	0.689	14	0	Normal
21	MA0901.2 (MA0901.2.HOXB13)	JASPAR2022_CORE_vertebrates_non-redundant	0.00606	7.42	0.689	14	0	Normal
22	MA0517.1 (MA0517.1.STAT1::STAT2)	JASPAR2022_CORE_vertebrates_non-redundant	0.00621	7.6	0.689	14	1	Reverse Complement
23	UP00032_1 (Gata3_primary)	uniprobe_mouse	0.007	8.56	0.696	14	7	Normal
24	MA0624.2 (MA0624.2.Nfatc1)	JASPAR2022_CORE_vertebrates_non-redundant	0.00735	8.99	0.696	12	-1	Normal
25	MA0465.2 (MA0465.2.CDX2)	JASPAR2022_CORE_vertebrates_non-redundant	0.00764	9.35	0.696	12	0	Normal
26	MA1104.2 (MA1104.2.GATA6)	JASPAR2022_CORE_vertebrates_non-redundant	0.00768	9.4	0.696	13	-1	Reverse Complement
27	MA1607.1 (MA1607.1.Foxl2)	JASPAR2022_CORE_vertebrates_non-redundant	0.0078	9.54	0.696	14	0	Normal
28	UP00090_1 (Elf3_primary)	uniprobe_mouse	0.00798	9.77	0.696	13	-1	Normal

## Sheet: STREME_3 TOMTOM
	Database	Used	Matched
	uniprobe_mouse	386	3
	JASPAR2022_CORE_vertebrates_non-redundant	838	8
	Total number of matches=		11
	Name	Database	p-value	e-value	q-value	overlap	offset	orientation
1	MA0050.3 (MA0050.3.Irf1)	JASPAR2022_CORE_vertebrates_non-redundant	0.00137	1.68	1	13	1	Reverse Complement
2	MA1623.1 (MA1623.1.Stat2)	JASPAR2022_CORE_vertebrates_non-redundant	0.00195	2.39	1	12	1	Reverse Complement
3	UP00075_2 (Sox15_secondary)	uniprobe_mouse	0.00199	2.44	1	11	4	Normal
4	MA1709.1 (MA1709.1.ZIM3)	JASPAR2022_CORE_vertebrates_non-redundant	0.00322	3.94	1	12	3	Reverse Complement
5	UP00390_1 (Tcf1_2666.2)	uniprobe_mouse	0.00332	4.06	1	13	0	Reverse Complement
6	MA1544.1 (MA1544.1.OVOL1)	JASPAR2022_CORE_vertebrates_non-redundant	0.00374	4.57	1	13	0	Normal
7	MA0653.1 (MA0653.1.IRF9)	JASPAR2022_CORE_vertebrates_non-redundant	0.00541	6.62	1	13	1	Reverse Complement
8	MA0703.2 (MA0703.2.LMX1B)	JASPAR2022_CORE_vertebrates_non-redundant	0.00564	6.9	1	11	0	Normal
9	UP00041_1 (Foxj1_primary)	uniprobe_mouse	0.00593	7.25	1	13	2	Reverse Complement
10	MA0157.3 (MA0157.3.Foxo3)	JASPAR2022_CORE_vertebrates_non-redundant	0.00619	7.58	1	12	-1	Reverse Complement
11	MA0517.1 (MA0517.1.STAT1::STAT2)	JASPAR2022_CORE_vertebrates_non-redundant	0.00677	8.29	1	12	3	Normal

## Sheet: STREME_4 TOMTOM
	Database	Used	Matched
	uniprobe_mouse	386	6
	JASPAR2022_CORE_vertebrates_non-redundant	838	3
	Total number of matches=		9
	Name	Database	p-value	e-value	q-value	overlap	offset	orientation
1	UP00090_2 (Elf3_secondary)	uniprobe_mouse	0.000579	0.708	1	16	1	Normal
2	UP00166_1 (Barhl1_2590.2)	uniprobe_mouse	0.00118	1.45	1	16	0	Normal
3	MA1623.1 (MA1623.1.Stat2)	JASPAR2022_CORE_vertebrates_non-redundant	0.0015	1.84	1	13	-1	Normal
4	MA0002.2 (MA0002.2.Runx1)	JASPAR2022_CORE_vertebrates_non-redundant	0.00187	2.28	1	11	-2	Reverse Complement
5	UP00037_1 (Zfp105_primary)	uniprobe_mouse	0.00235	2.87	1	15	0	Normal
6	UP00204_1 (Gbx1_2883.2)	uniprobe_mouse	0.00308	3.77	1	16	0	Normal
7	UP00072_1 (IRC900814_primary)	uniprobe_mouse	0.00475	5.81	1	16	0	Normal
8	MA1588.1 (MA1588.1.ZNF136)	JASPAR2022_CORE_vertebrates_non-redundant	0.00623	7.63	1	15	0	Reverse Complement
9	UP00151_1 (Barx2_3447.2)	uniprobe_mouse	0.00726	8.89	1	16	0	Reverse Complement

## Sheet: STREME_5 TOMTOM
	Database	Used	Matched
	uniprobe_mouse	386	4
	JASPAR2022_CORE_vertebrates_non-redundant	838	8
	Total number of matches=		12
	Name	Database	p-value	e-value	q-value	overlap	offset	orientation
1	MA1107.2 (MA1107.2.KLF9)	JASPAR2022_CORE_vertebrates_non-redundant	0.000599	0.733	1	14	0	Normal
2	MA0162.4 (MA0162.4.EGR1)	JASPAR2022_CORE_vertebrates_non-redundant	0.0014	1.71	1	13	1	Normal
3	UP00025_2 (Foxk1_secondary)	uniprobe_mouse	0.00186	2.28	1	14	0	Normal
4	MA0030.1 (MA0030.1.FOXF2)	JASPAR2022_CORE_vertebrates_non-redundant	0.00188	2.31	1	14	0	Normal
5	UP00026_2 (Zscan4_secondary)	uniprobe_mouse	0.00207	2.54	1	14	1	Normal
6	UP00042_2 (Gm397_secondary)	uniprobe_mouse	0.00294	3.6	1	13	3	Normal
7	MA0732.1 (MA0732.1.EGR3)	JASPAR2022_CORE_vertebrates_non-redundant	0.00315	3.86	1	14	1	Normal
8	MA0073.1 (MA0073.1.RREB1)	JASPAR2022_CORE_vertebrates_non-redundant	0.00352	4.31	1	14	4	Normal
9	UP00034_2 (Sox7_secondary)	uniprobe_mouse	0.00431	5.27	1	14	2	Reverse Complement
	MA1627.1 (MA1627.1.Wt1)	JASPAR2022_CORE_vertebrates_non-redundant	0.00534	6.54	1	13	1	Normal
	MA1623.1 (MA1623.1.Stat2)	JASPAR2022_CORE_vertebrates_non-redundant	0.00556	6.81	1	12	1	Normal
	MA1155.1 (MA1155.1.ZSCAN4)	JASPAR2022_CORE_vertebrates_non-redundant	0.00622	7.61	1	13	2	Normal
